# Supplementary material for: Electroactivity of graphene oxide on different substrates
Source: Royal Society of Chemistry journal article supplement (doi:10.1039/c2ra22079b), 2012-01-01
Supplement: c2ra22079b.pdf [file c2ra22079b.pdf]

## ***Supporting Information***

### **Electroactivity of graphene oxide on different substrates**

Alessandra Bonanni and Martin Pumera\*

Division of Chemistry & Biological Chemistry, School of Physical and Mathematical Sciences, Nanyang

Technological University, Singapore 637371

Fax: (65) 6791-1961

Email: [pumera@ntu.edu.sg](mailto:pumera@ntu.edu.sg)

\*Author for correspondence

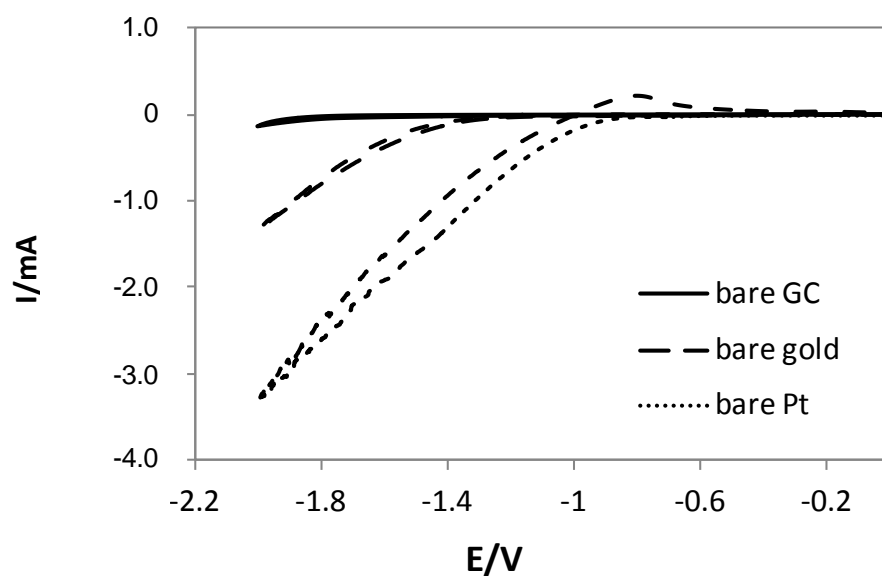

**Figure S1.** Cyclic voltammograms for platinum bare electrode (Pt - dotted curve), gold bare electrode (Au – dashed curve), and glassy carbon bare electrode (GC – black curve). Measurements were performed in PBS buffer solution, pH 7.
